# Supplementary material for: Rubik’s Cube as Reconfigurable Microfluidic Platform for Rapid Setup and Switching of Analytical Devices
Source: MDPI journal article supplement (doi:10.3390/mi13122054), 2022-11-24
Supplement: s1 [file s1]

## Supplementary Information

# **Rubik's Cube as Reconfigurable Microfluidic Platform for Rapid Setup and Switching of Analytical Devices**

Xiaochen Lai <sup>1,2,\*</sup>, Yanfei Sun <sup>1,2</sup>, Mingpeng Yang <sup>1,2</sup>, Hao Wu<sup>3</sup>

1. School of Automation, Nanjing University of Information Science & Technology, Nanjing, 210044, China;
2. Jiangsu Collaborative Innovation Center of Atmospheric Environment and Equipment Technology (CI-CAEET), Nanjing University of Information Science & Technology, Nanjing, 210044, China
3. State Key Laboratory of Precision Measuring Technology and Instruments, Tianjin University, Tianjin 300072, China

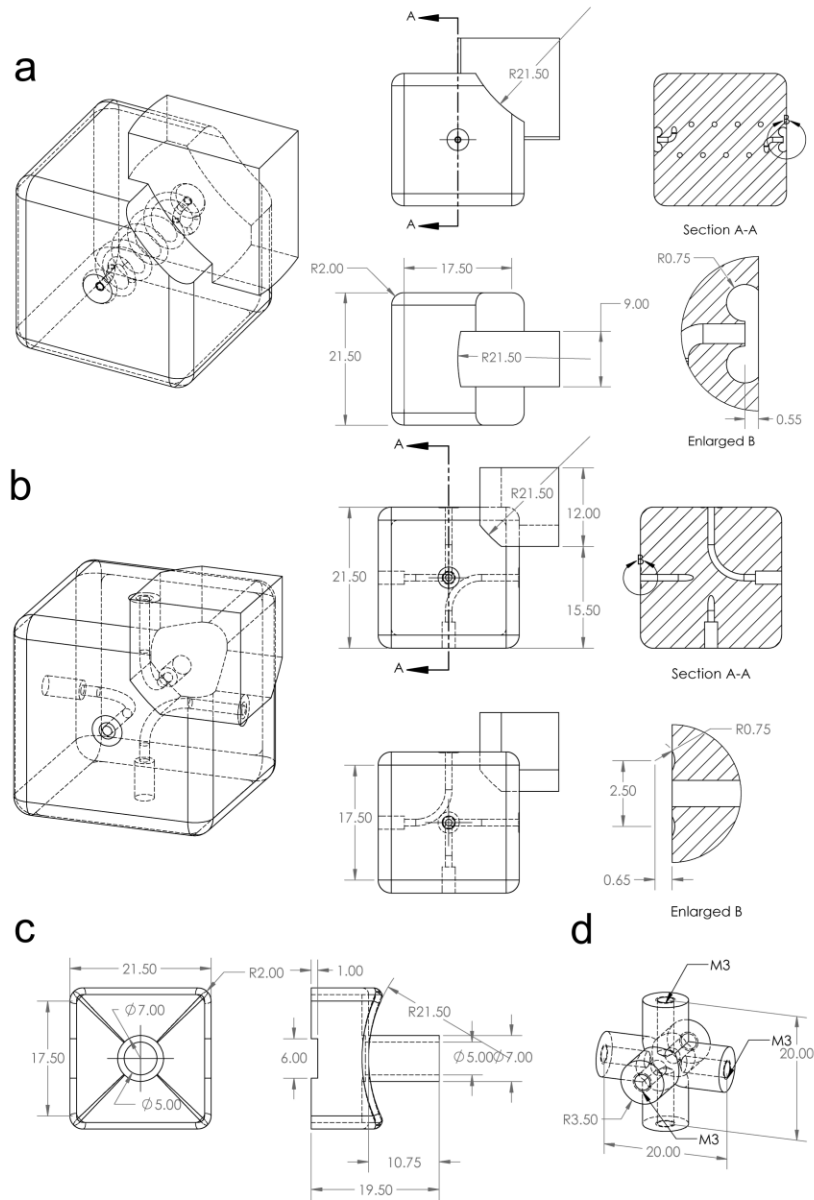

**Figure S1** Dimensions of the major components of the microfluidic cube. **(a)**. An edge block with a spiral channel. Right bottom: enlarged view of the O-ring embedding torus concave. **(b)**. A corner block of 3-way inlets/outlets. Right bottom: enlarged view of the O-ring fitting torus concave. **(c)**. A central block. **(d)**. The cube core. All values are in mm.

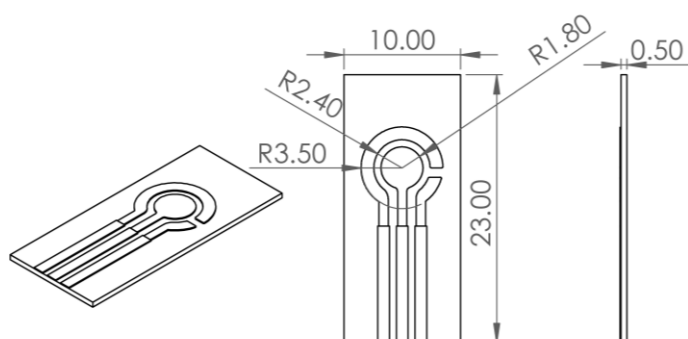

**Figure S2.** Dimensions of the three-electrode electrochemical sensor. Unit: mm.

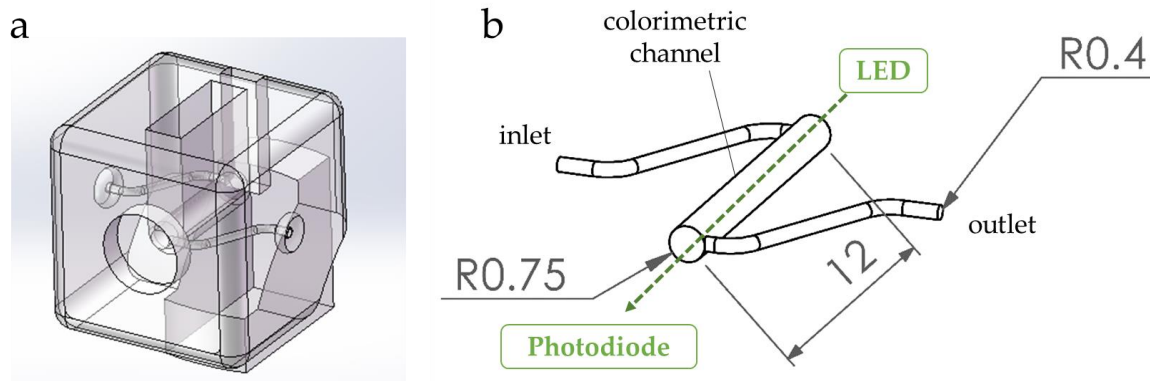

**Figure S3.** Dimensions of the colorimetric module. (a). A transparent illustration of the colorimetric module frame (without black epoxy resin, LED, and photodiode). (b). Geometry and dimensions of the actual fluid channel inside the module. Unit:mm.

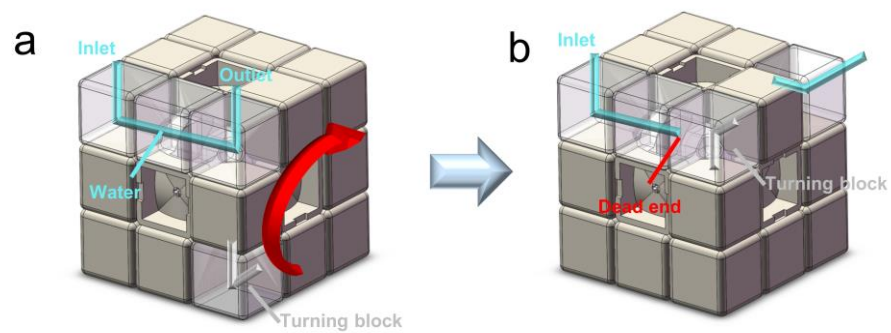

**Figure S4.** Experimental setup of the pressure resistance test of the microfluidic cube. **(a).** At first, The microfluidic cube is configured to have 3 blocks: Inlet, straight channel and outlet. Water is injected into the cube to fill the channel. **(b).** Afterward, turn a turning corner block to replace the outlet block to form a dead end for the microchannel. Then, the pressure generated by an air compressor and a pressure relief valve is applied to the inlet to verify the pressure resistance.
